# Supplementary material
Source: PubMed Central journal article supplement (PMC7196130)
Supplement: 41422_2020_300_MOESM3_ESM.pdf [file 41422_2020_300_MOESM3_ESM.pdf]

**Fig. S3**

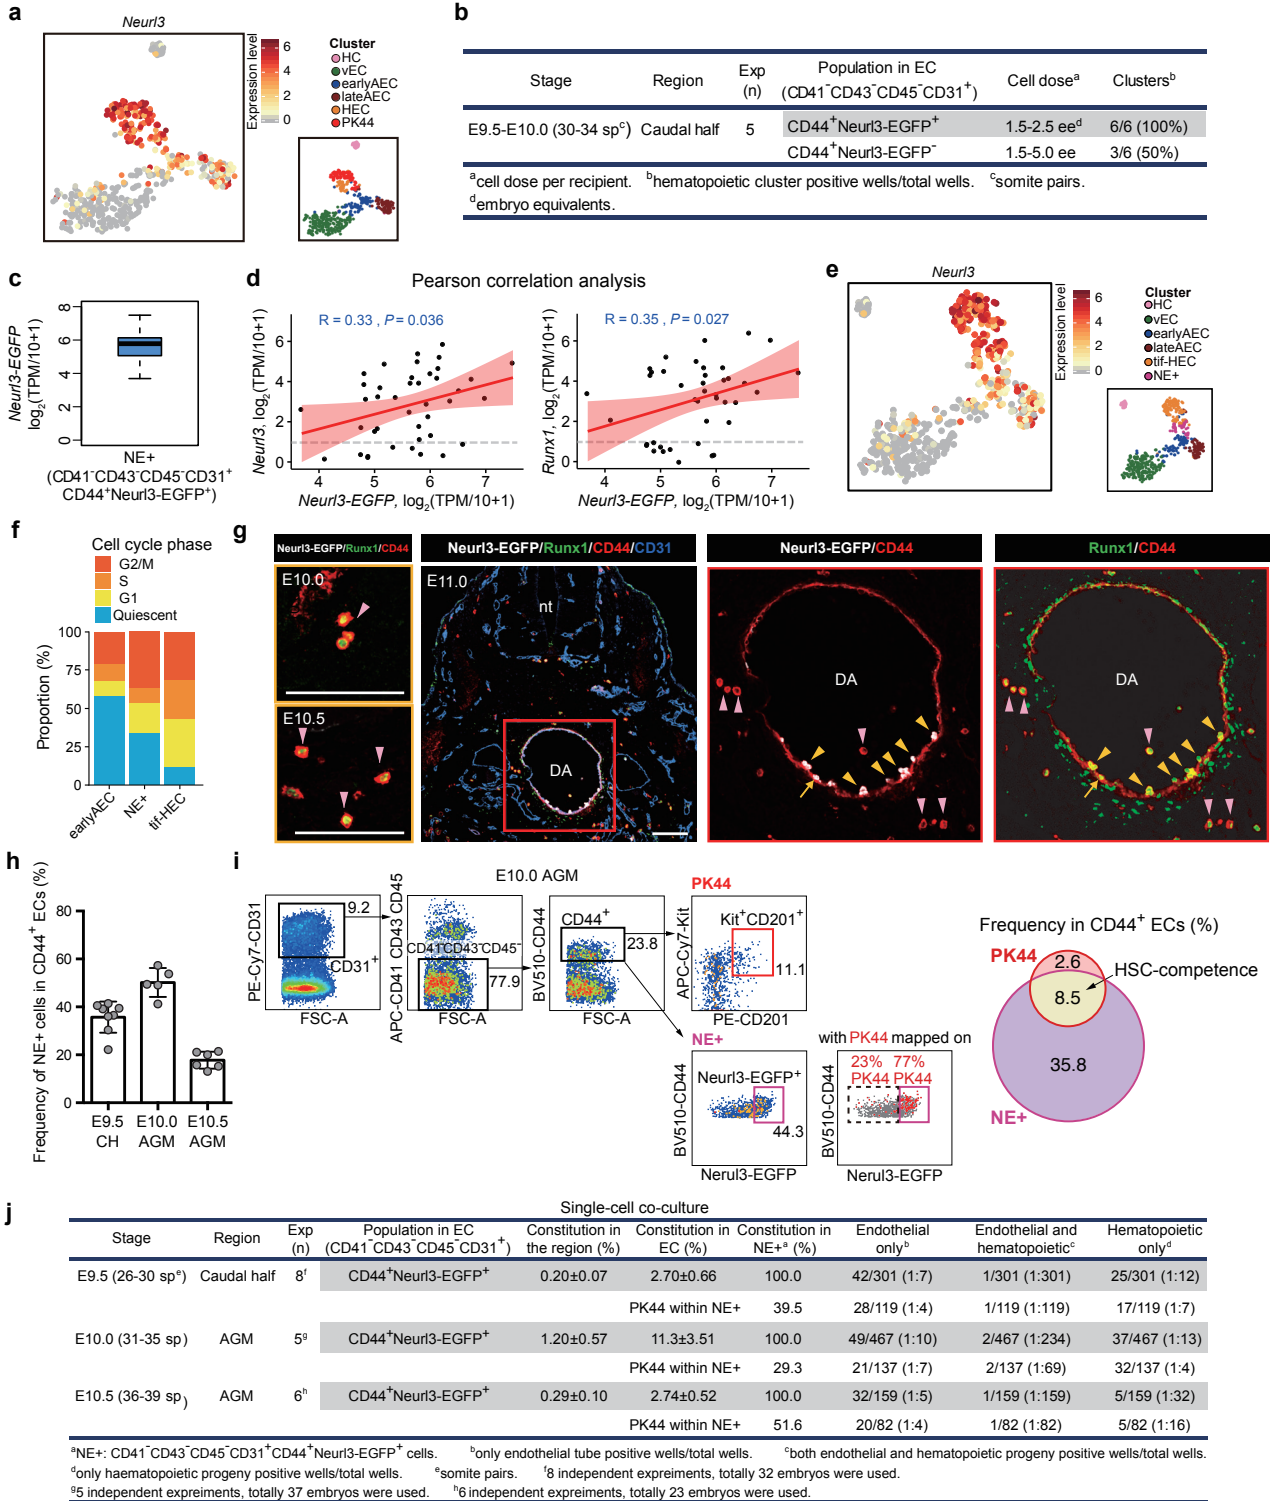

**Supplementary Figure 3.** Identification of the HSC-competent HECs marked by *Neur13*-EGFP reporter. **a.** Expression of *Neur13* exhibited on t-SNE plot. The same t-SNE plot with the clusters of interest (HC, vEC, earlyAEC, lateAEC, HEC, and PK44) mapped on it is shown to the right. **b.** Detailed information of the co-culture/transplantation assays performed with the caudal half cells from E9.5-E10.0 *Neur13<sup>EGFP/+</sup>* embryos. **c.** Boxplot showing the transcriptional expression level of *EGFP* in NE+ cell population, NE+, CD41<sup>-</sup>CD43<sup>-</sup>CD45<sup>-</sup>CD31<sup>+</sup>CD44<sup>+</sup>*Neur13*-EGFP<sup>+</sup> population from AGM region of E10.0 *Neur13<sup>EGFP/+</sup>* embryos. **d.** Scatter plots showing correlation of the expression of *EGFP* with that of *Neur13* and *Runx1*, respectively. Fitted line and 95% confidence interval are shown in red. Pearson correlation coefficients and *P* values are also shown in blue text. **e.** Expression of *Neur13* exhibited on t-SNE plot. The same t-SNE plot with the clusters of interest (HC, vEC, earlyAEC, lateAEC, tif-HEC, and NE+) mapped on it is shown to the right. **f.** Stacked bar chart showing the constitution of different cell cycle phases in the indicated clusters. **g.** Representative immunostaining on cross sections at AGM region of E10.0-E10.5 (left column) and E11.0 (right three panels) *Neur13<sup>EGFP/+</sup>* embryos. Arrow indicates *Neur13*-EGFP<sup>+</sup> aortic ECs; Yellow arrowheads indicate *Neur13*-EGFP<sup>+</sup> bulging and bulged cells and also IAHCs. White pink arrowheads indicate CD44<sup>+</sup>*Runx1*<sup>+</sup>*Neur13*-EGFP<sup>-</sup> hematopoietic cells distributed outside the aorta. Images in yellow boxes show the corresponding high magnification views of those in Fig. 5a. nt, neural tube; DA, dorsal aorta. Scale bars, 100  $\mu$ m. **h.** Graph showing the frequencies of the NE+ (CD41<sup>-</sup>CD43<sup>-</sup>CD45<sup>-</sup>CD31<sup>+</sup>CD44<sup>+</sup>*Neur13*-EGFP<sup>+</sup>) cells in CD44<sup>+</sup> ECs in E9.5 caudal half (CH) or E10.0-E10.5 AGM region of *Neur13<sup>EGFP/+</sup>* embryos. Data are means  $\pm$  s.d.. Data are from 8, 5, and 6 independent experiments for E9.5, E10.0, and E10.5 embryos, respectively. **i.** Representative FACS plots and the corresponding diagram to the right showing the relationship between PK44 and NE+ populations in E10.0 AGM of *Neur13<sup>EGFP/+</sup>* embryos. **j.** Detailed information of endothelial-hematopoietic dual-potential induction assays performed with cells from E9.5 caudal half and E10.0-E10.5 AGM region of *Neur13<sup>EGFP/+</sup>* embryos.
