# Supplementary material
Source: PubMed Central journal article supplement (PMC7196130)
Supplement: 41422_2020_300_MOESM4_ESM.pdf [file 41422_2020_300_MOESM4_ESM.pdf]

**Fig. S4**

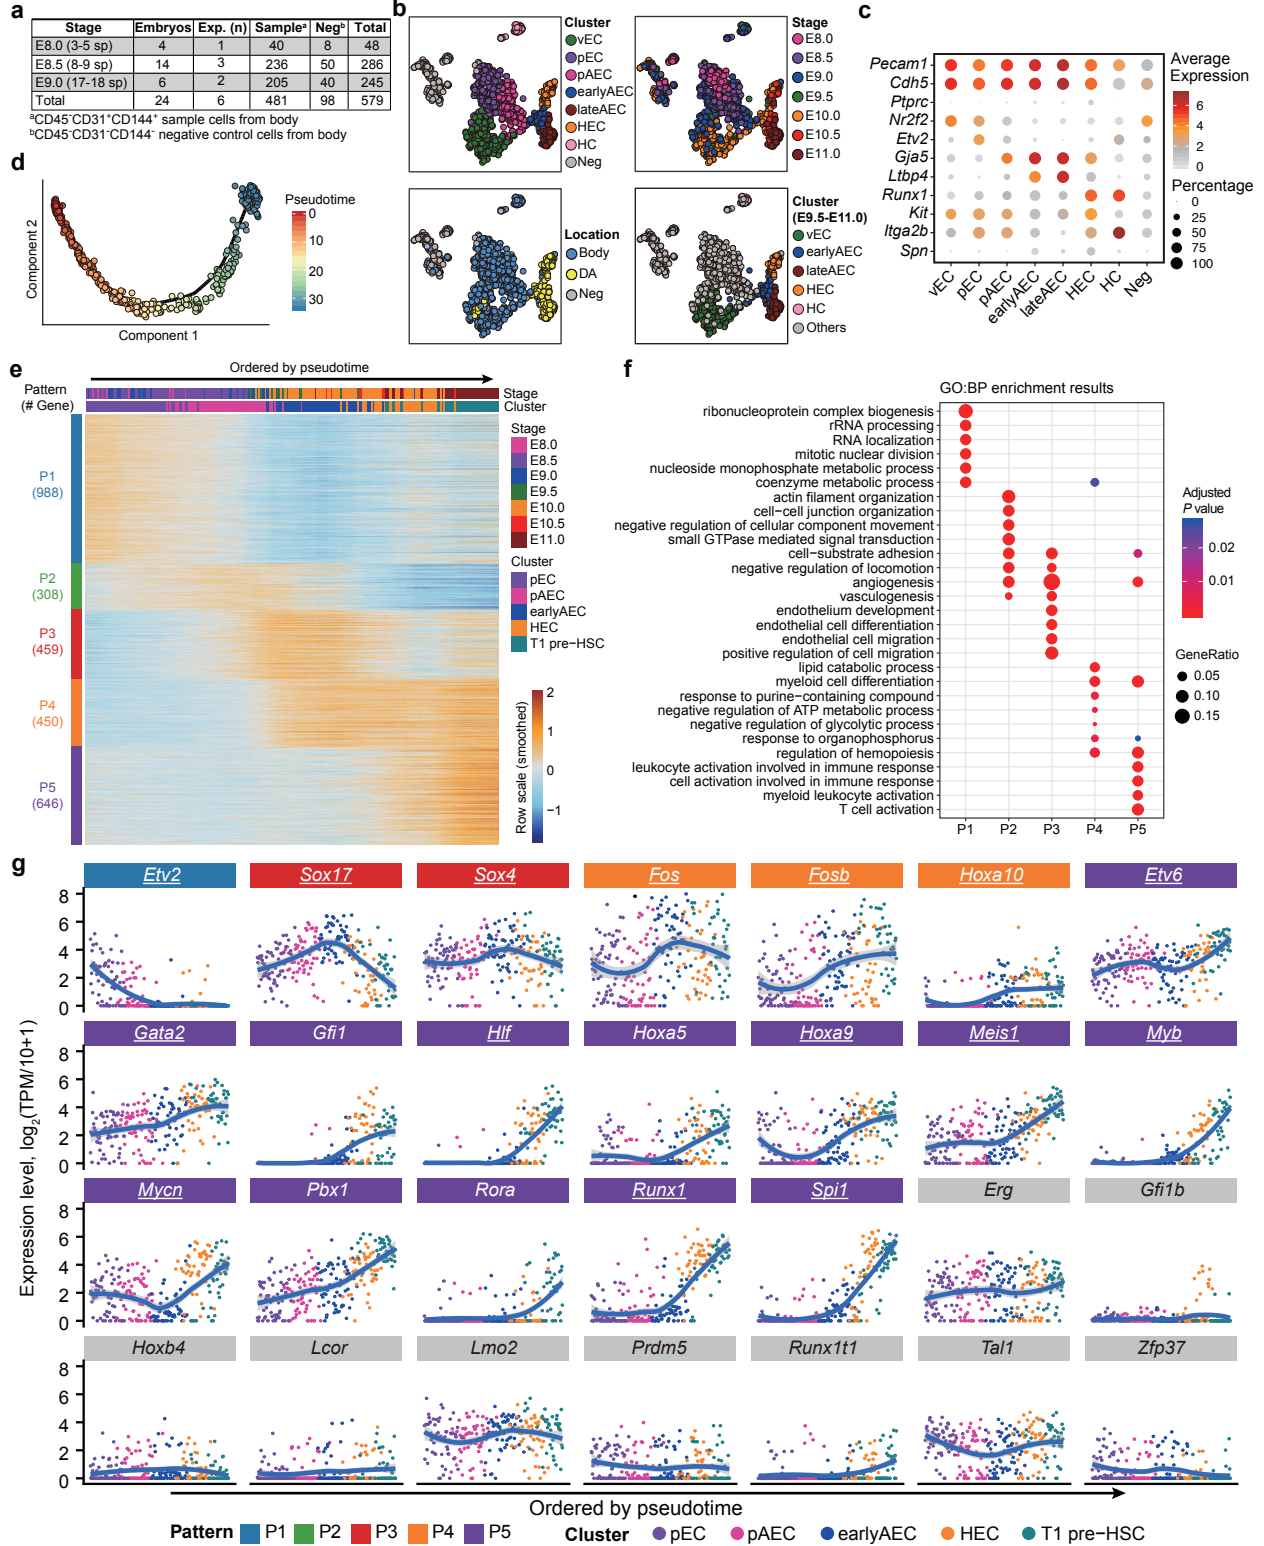

**Supplementary Figure 4.** Molecular programs from primitive vascular ECs to HSC-primed HECs. **a.** Embryo, independent experiment, and cell number information for additional scRNA-seq. sp, somite pairs. **b.** t-SNE plots with clusters (upper left), sampling locations (lower left), embryonic stages (upper right) and clusters previously defined (lower right) mapped onto it. **c.** Dot plot showing the average and percentage expression of selected marker genes in the indicated clusters. **d.** Pseudotemporal ordering of the cells involved in HEC specification, including those in pEC, pAEC, earlyAEC, HEC, and T1 pre-HSC, inferred by monocle 2, with pseudotime mapped to it. **e.** Heatmap showing smoothed and scaled expression levels of 2 851 pattern genes. Genes are ordered by patterns. Cells are ordered by pseudotime. **f.** Dot plot showing the top six enriched Gene Ontology biological process (GO:BP) terms for each pattern. Dot color indicates statistical significance of the enrichment and dot size represents the fraction of genes annotated to each term. **g.** Scatter plots showing the expression levels of the TF genes previously reported to be functional in HSPC regeneration along the pseudotemporal order with loess smoothed fit curves and 95% confidence interval indicated. The patterns to which the genes belong are indicated by different fill colors. The core TFs of the significantly overlapped regulons are underlined.
